# Supplementary material for: Investigation of Lonicera japonica Flos against Nonalcoholic Fatty Liver Disease Using Network Integration and Experimental Validation
Source: MDPI journal article supplement (doi:10.3390/medicina58091176), 2022-08-29
Supplement: s1 [file s1]

## **Outline of the Supplementary material**

### **Tables**

**Table S1** Primer sequences of TNF and CASP3

**Table S2** Protein function potential targets from main active ingredients of LJF against NAFLD

**Table S3** Protein function potential targets from main active ingredients of LJF against NAFLD

### **Figures**

**Figure S1.** Typical chromatograms of mixed standards (A) and LJF samples (B).

**Supplementary Table S1** Primer sequences of TNF and CASP3

| Name       | Sequences (5'-3')       |
|------------|-------------------------|
| hGAPDH-F   | GGAGCGAGATCCCTCCAAAAT   |
| hGAPDH-R   | GGCTGTTGTCATACTTCTCATGG |
| Hu-TNF-F   | GAGGCCAAGCCCTGGTATG     |
| Hu-TNF-R   | CGGGCCGATTGATCTCAGC     |
| Hu-CASP3-F | CATGGAAGCGAATCAATGGACT  |
| Hu-CASP3-R | CTGTACCAGACCGAGATGTCA   |

**Supplemental Table S2** Protein function potential targets from main active ingredients of LJF against NAFLD

| NO. | Gene symbol | Description                                            |
|-----|-------------|--------------------------------------------------------|
| 1   | APP         | amyloid beta precursor protein                         |
| 2   | MMP2        | matrix metalloproteinase 2                             |
| 3   | PYGL        | glycogen phosphorylase L                               |
| 4   | PRKCD       | protein kinase C delta                                 |
| 5   | CA1         | carbonic anhydrase 1                                   |
| 6   | CASP3       | caspase 3                                              |
| 7   | ELANE       | elastase, neutrophil expressed                         |
| 8   | CASP2       | caspase 2                                              |
| 9   | FTO         | FTO alpha-ketoglutarate dependent dioxygenase          |
| 10  | TTR         | transthyretin                                          |
| 11  | MMP1        | matrix metalloproteinase 1                             |
| 12  | TNF         | tumor necrosis factor                                  |
| 13  | XDH         | xanthine dehydrogenase                                 |
| 14  | NOX4        | NADPH oxidase 4                                        |
| 15  | ACHE        | acetylcholinesterase (Cartwright blood group)          |
| 16  | RPS6KA3     | ribosomal protein S6 kinase A3                         |
| 17  | PTGS2       | prostaglandin-endoperoxide synthase 2                  |
| 18  | ALDH2       | aldehyde dehydrogenase 2 family member                 |
| 19  | EGFR        | epidermal growth factor receptor                       |
| 20  | TERT        | telomerase reverse transcriptase                       |
| 21  | HSP90AA1    | heat shock protein 90 alpha family class A member 1    |
| 22  | ADORA2A     | adenosine A2a receptor                                 |
| 23  | IGFBP3      | insulin like growth factor binding protein 3           |
| 24  | ALOX12      | arachidonate 12-lipoxygenase, 12S type                 |
| 25  | PABPC1      | poly(A) binding protein cytoplasmic 1                  |
| 26  | HSPA5       | heat shock protein family A (Hsp70) member 5           |
| 27  | PTPN11      | protein tyrosine phosphatase non-receptor type 11      |
| 28  | FDFT1       | farnesyl-diphosphate farnesyltransferase 1             |
| 29  | PFKFB3      | 6-phosphofructo-2-kinase/fructose-2,6-bisphosphatase 3 |

**Supplemental Table S3** Protein function potential targets from main active ingredients of LJF against NAFLD

| NO. | Gene symbol | Protein function                                      |
|-----|-------------|-------------------------------------------------------|
| 1   | APP         | amyloid beta precursor protein                        |
| 2   | MMP2        | matrix metalloproteinase 2                            |
| 3   | PYGL        | glycogen phosphorylase L                              |
| 4   | PRKCD       | protein kinase C delta                                |
| 5   | CA1         | carbonic anhydrase 1                                  |
| 6   | CASP3       | caspase 3                                             |
| 7   | ELANE       | elastase, neutrophil expressed                        |
| 8   | CASP2       | caspase 2                                             |
| 9   | FTO         | FTO alpha-ketoglutarate dependent dioxygenase         |
| 10  | TTR         | transthyretin                                         |
| 11  | MMP1        | matrix metalloproteinase 1                            |
| 12  | TNF         | tumor necrosis factor                                 |
| 13  | XDH         | xanthine dehydrogenase                                |
| 14  | NOX4        | NADPH oxidase 4                                       |
| 15  | ACHE        | acetylcholinesterase (Cartwright blood group)         |
| 16  | RPS6KA3     | ribosomal protein S6 kinase A3                        |
| 17  | PTGS2       | prostaglandin-endoperoxide synthase 2                 |
| 18  | ALDH2       | aldehyde dehydrogenase 2 family member                |
| 19  | EGFR        | epidermal growth factor receptor                      |
| 20  | TERT        | telomerase reverse transcriptase                      |
| 21  | HSP90AA1    | heat shock protein 90 alpha family class A member 1   |
| 22  | ADORA2A     | adenosine A2a receptor                                |
| 23  | IGFBP3      | insulin like growth factor binding protein 3          |
| 24  | ALOX12      | arachidonate 12-lipoxygenase, 12S type                |
| 25  | PABPC1      | poly(A) binding protein cytoplasmic 1                 |
| 26  | HSPA5       | heat shock protein family A (Hsp70) member 5          |
| 27  | PTPN11      | protein tyrosine phosphatase non-receptor type 11     |
| 28  | FDFT1       | farnesyl-diphosphate farnesyltransferase 1            |
| 29  | PFKFB3      | 6-phosphofructo-2-kinase/fructose-2,6-biphosphatase 3 |

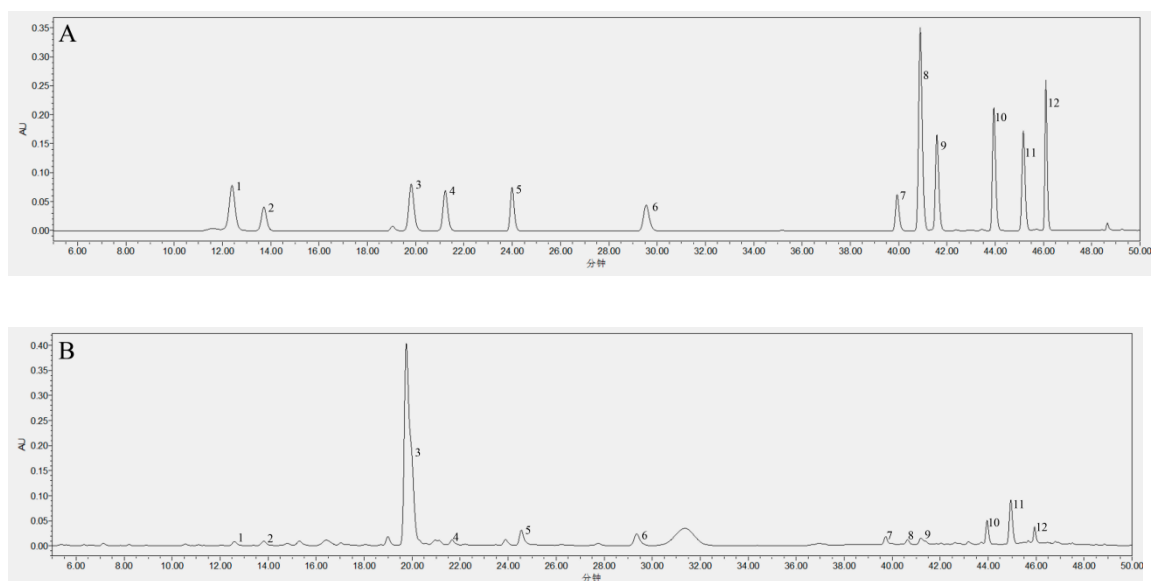

**Supplemental Figure S1.** Typical chromatograms of mixed standards (A) and LJF samples (B).

1. Neochlorogenic acid, 2. Loganic acid, 3. Chlorogenic acid, 4. Cryptochlorogenic acid, 5. Loganin, 6. Secoxyloganin, 7. Rutinum, 8. Hyperoside, 9. Isochlorogenic acid B, 10. Isochlorogenic acid A, 11. Isochlorogenic acid C, 12. Luteoloside.
